# Supplementary material for: Conversion of a surfactant-based microemulsion to a surfactant-free microemulsion by CO2
Source: Royal Society of Chemistry journal article supplement (doi:10.1039/c8sm02444h), 2018-12-13
Supplement: c8sm02444h1.pdf [file c8sm02444h1.pdf]

## **Conversion of Surfactant-Based Microemulsion to Surfactant-Free Microemulsion by CO<sub>2</sub>**

*Dongfang Liu,<sup>a</sup> Hongsheng Lu,<sup>\*ab</sup> Ying Zhang,<sup>a</sup> Peiyao Zhu,<sup>a</sup> and Zhiyu Huang,<sup>\*ab</sup>*

<sup>a</sup>College of Chemistry and Chemical Engineering, Southwest Petroleum University,  
Chengdu 610500, P. R. China

<sup>b</sup>Oil & Gas Field Applied Chemistry Key Laboratory of Sichuan Province, Chengdu  
610500, P. R. China

---

\*Corresponding author:

Email: Hongsheng Lu( hshlu@163.com); Zhiyu Huang (zyhuang3019@163.com).

Fax: +86-28-83037330; Tel: +86-28-83037330.

College of Chemistry and Chemical Engineering, Southwest Petroleum University,  
Chengdu 610500, P. R. China.

1. The ternary phase diagram of the microemulsion corresponding to the different  $R_{I/N}$  values.

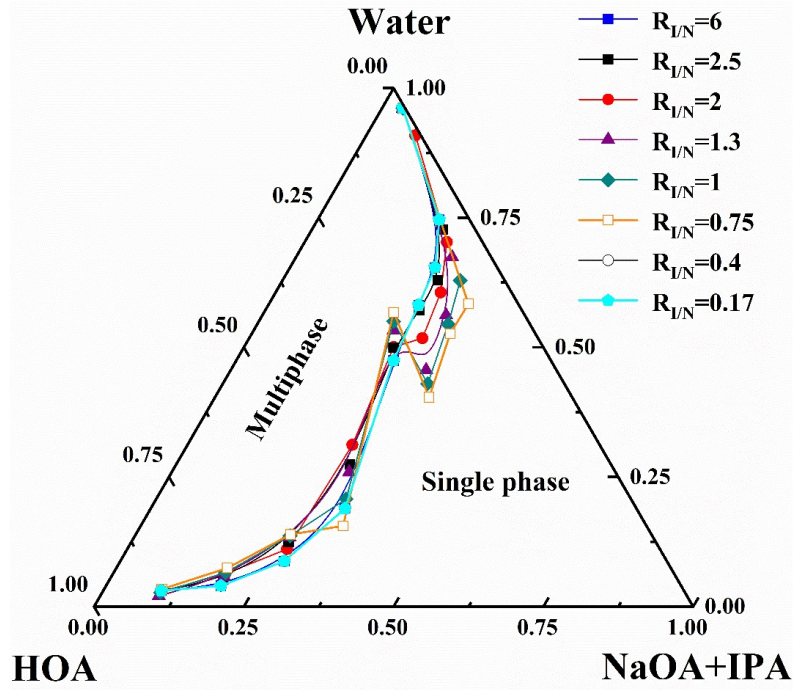

**Figure S1.** Effect of the ratio of different IPA and NaOA on the pseudo-ternary phase diagram of microemulsion.

## 2. Molecular state distribution of species

Through the following formula, we can plot the molecular state distribution of a substance under different pH conditions. This material can have only one  $pK_a$  value or more.<sup>1, 2</sup>

$$x_i = \frac{[H^+]^i \prod_{i=0}^{n-i} K_{ai}}{\sum_{i=0}^n [H^+]^i \prod_{i=0}^{n-i} K_{ai}} (K_{a0} = 1; i = 0, 1, \dots, n) \quad (S1-1)$$

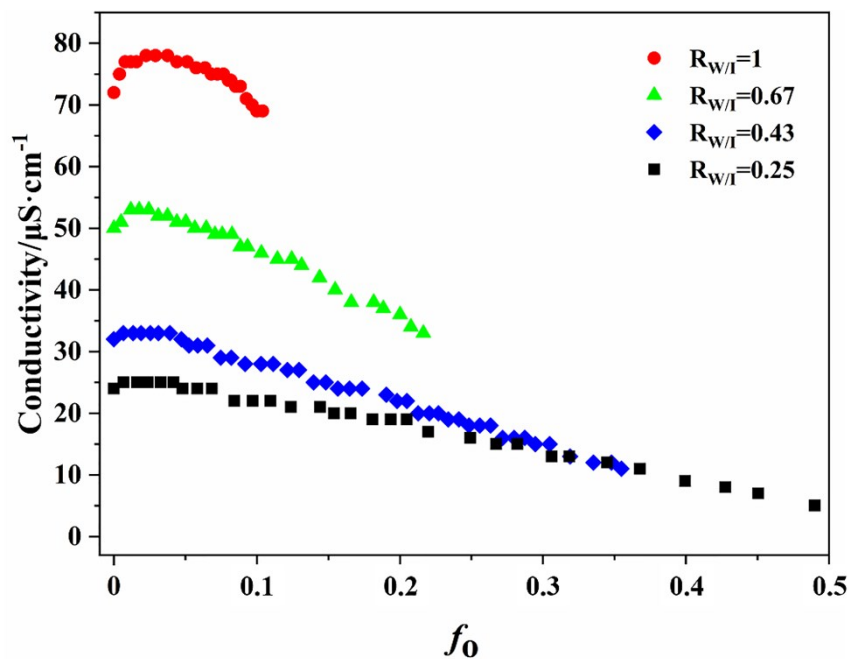

**Figure S2.** Effect of oleic acid content ( $f_o$ ) on electrical conductivity of ternary system.

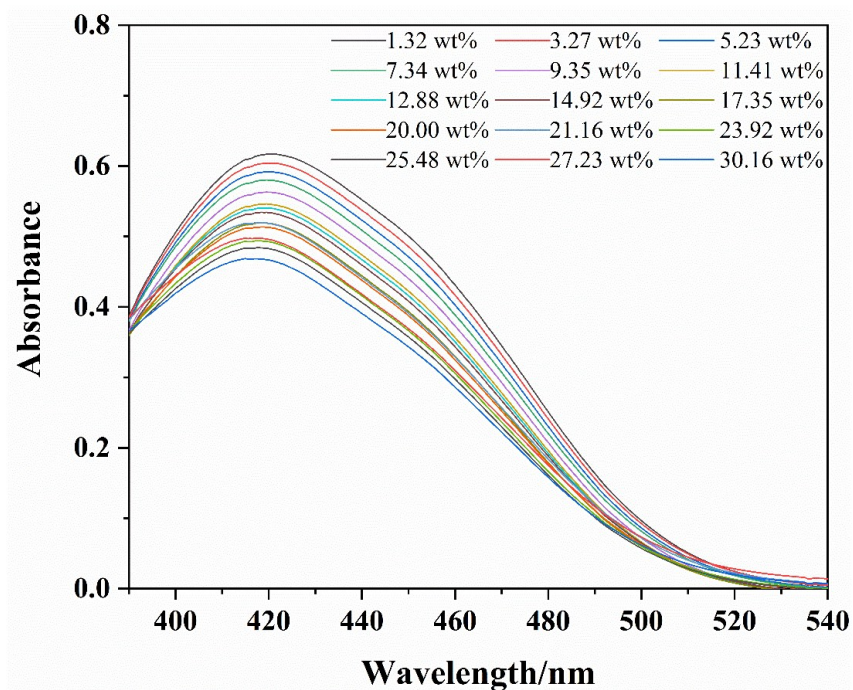

**Figure S3.** The UV-vis absorption curve of MO corresponds to different mass fractions of HOA (1.32 wt%-30.16 wt%).

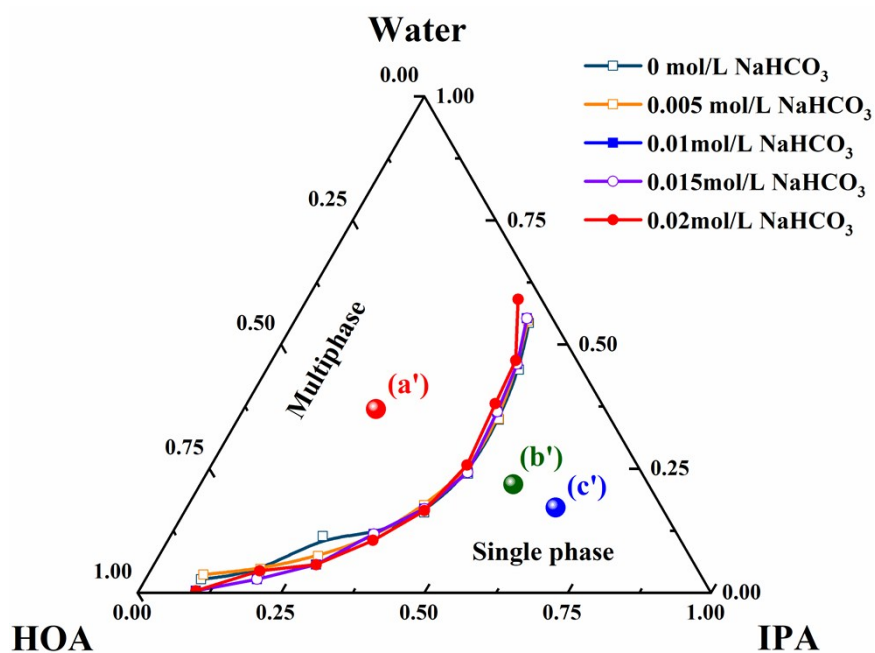

**Figure S4.** The effect of different concentrations of  $\text{NaHCO}_3$  on the ternary phase diagram.

**Table S1.** The pH values of SFMEs without  $\text{NaHCO}_3$  addition.

| IPA/g | $\text{H}_2\text{O/g}$ | HOA/g  | pH   |
|-------|------------------------|--------|------|
| 2.5   | 4                      | 4.3196 | -    |
| 10    | 4                      | 4.3196 | 3.96 |
| 15    | 4                      | 4.3196 | 4.24 |

**Table S2.** The pH values of SFMEs with 0.02mol/L  $\text{NaHCO}_3$  addition.

| IPA/g | 0.02mol/L<br>$\text{NaHCO}_3/\text{g}$ | HOA/g  | pH   |
|-------|----------------------------------------|--------|------|
| 2.5   | 4                                      | 4.3196 | -    |
| 10    | 4                                      | 4.3196 | 5.17 |
| 15    | 4                                      | 4.3196 | 5.43 |

## References

1. D. Liu, Y. Suo, J. Tan and H. Lu, *Soft Matter*, 2017, **13**, 3783-3788.
2. C. C. Zhou, X. H. Cheng, O. D. Zhao, S. Liu, C. J. Liu, J. D. Wang and J. B. Huang, *Soft Matter*, 2014, **10**, 8023-8030.
